# Supplementary material for: Aquaculture Reuse Water, Genetic Line, and Vaccination Affect Rainbow Trout (Oncorhynchus mykiss) Disease Susceptibility and Infection Dynamics
Source: Front Immunol. 2021 Sep 22;12:721048. doi: 10.3389/fimmu.2021.721048 (PMC8493035; doi:10.3389/fimmu.2021.721048)
Supplement: Supplementary file 4 [file DataSheet_1.xlsx]

## Sheet: Suppl. Table 1
Supplemental Table 1. Live-sampled fish measurement of F. psychrophilum and IHNV load.
						BCWD		IHNV
						External (gill/fin)	Internal (kid/spln)	External (gill/fin)	Internal (kid/spln)	Co-infect	Neither
Exposure	Line	IHNV Vac	Tank	Day	Fish #	Fp GE/g	Fp GE/g	Copies/g	Copies/g	(+ either Ext or Int)	Fp+ or IHNV+
Control	CSF	Sham	12	10	4	n.d.	n.d.	n.d.	n.d.		yes
			12	10	5	n.d.	n.d.	n.d.	n.d.		yes
Control	CSF	Vaccinated	7	10	1	n.a.	n.d.	n.a.	n.d.		yes
			7	10	2	n.a.	n.d.	n.a.	n.d.		yes
Control	Tx	Sham	6	10	4	n.d.	n.d.	n.d.	n.d.		yes
			6	10	5	n.d.	n.d.	n.d.	n.d.		yes
Control	Tx	Vaccinated	11	10	1	n.a.	n.d.	n.a.	n.d.		yes
			11	10	2	n.a.	n.d.	n.a.	n.d.		yes
Constant	CSF	Sham	14	10	1	n.d.	n.d.	n.d.	n.d.		yes
			14	10	2	2871.2	n.d.	n.d.	n.d.
			14	10	3	n.d.	n.d.	n.d.	n.d.		yes
			14	10	4	n.d.	n.d.	n.d.	n.d.		yes
			14	10	5	b.q.	239934	n.d.	n.d.
			14	12	1	n.d.	n.d.	n.d.	n.d.		yes
			14	12	2	2248.25	n.d.	2.81867e+08	443045	yes
			14	12	3	n.d.	n.d.	n.d.	n.d.		yes
			14	12	4	b.q.	n.d.	n.d.	n.d.		yes
			14	12	5	b.q.	n.d.	n.d.	n.d.		yes
Constant	CSF	Vaccinated	24	10	1	2477.57	n.d.	n.d.	n.d.
			24	10	2	b.q.	n.d.	n.d.	n.d.		yes
			24	10	3	1155.71	n.d.	n.d.	n.d.
			24	10	4	b.q.	n.d.	52950	n.d.
			24	10	5	1655.03	n.d.	n.d.	n.d.
			24	12	1	4858.31	230403	n.d.	n.d.
			24	12	2	7592.57	n.d.	n.d.	n.d.
			24	12	3	4537.94	n.d.	n.d.	n.d.
			24	12	4	2023.46	n.d.	n.d.	n.d.
			24	12	5	1381.53	n.d.	n.d.	n.d.
Constant	Tx	Sham	21	10	1	6842.93	n.d.	12075.6	3.62642e+06	yes
			21	10	2	65783.7	180193	n.d.	n.d.
			21	10	3	734370	n.d.	328590	175878	yes
			21	10	4	b.q.	n.d.	55996.6	74327.5
			21	10	5	11456.6	n.d.	n.d.	n.d.
			21	12	1	3.4798e+06	243467	1.06361e+06	n.d.	yes
			21	12	2	b.q.	n.d.	n.d.	n.d.		yes
			21	12	3	1134.92	n.d.	n.d.	n.d.
			21	12	4	81702.3	21657	17938.1	n.d.	yes
			21	12	5	b.q.	n.d.	n.d.	n.d.
Constant	Tx	Vaccinated	16	10	1	b.q.	n.d.	n.d.	n.d.
			16	10	2	n.d.	n.d.	n.d.	n.d.		yes
			16	10	3	b.q.	n.d.	n.d.	n.d.
			16	10	4	n.d.	n.d.	n.d.	n.d.		yes
			16	10	5	n.d.	n.d.	n.d.	n.d.		yes
			16	12	1	2154.73	n.d.	n.d.	n.d.
			16	12	2	6280.29	n.d.	n.d.	n.d.
			16	12	3	1323.03	n.d.	n.d.	n.d.
			16	12	4	1767.98	2110.95	n.d.	n.d.
			16	12	5	468624	n.d.	n.d.	n.d.
Pulsed	CSF	Sham	8	10	4	n.a.	517247	n.a.	322885	yes
			8	10	5	n.a.	n.d.	n.a.	n.d.		yes
Pulsed	CSF	Vaccinated	3	10	1	n.a.	n.d.	n.a.	n.d.		yes
			3	10	2	n.a.	n.d.	n.a.	n.d.		yes
Pulsed	Tx	Sham	10	10	1	n.d.	n.d.	n.d.	n.d.		yes
			10	10	2	18939.5	1324.3	n.d.	n.d.
			10	10	3	n.d.	n.d.	n.d.	9618.74
			10	10	4	n.d.	n.d.	n.d.	39420.7
			10	10	5	n.d.	n.d.	214498	2.8692e+06
			10	19	1	2128.09	n.d.	4.55027e+07	n.d.	yes
			10	19	2	n.d.	n.d.	n.d.	n.d.		yes
			10	19	3	n.d.	n.d.	n.d.	n.d.		yes
			10	19	4	n.d.	n.d.	60563.8	n.d.
			10	19	5	n.d.	n.d.	n.d.	38397.1
Pulsed	Tx	Vaccinated	1	10	4	b.q.	n.d.	n.d.	30810.4
			1	10	5	n.d.	n.d.	n.d.	n.d.		yes
Donor	CSF	Sham	18	10	1	2.56101e+06	n.d.	n.d.	n.d.
			18	10	2	9658.16	n.d.	n.d.	n.d.
			18	10	3	4448.21	n.d.	4.67077e+06	1.15802e+06	yes
			18	10	4	22782	n.d.	n.d.	n.d.
			18	10	5	8793.69	n.d.	n.d.	n.d.
			18	12	1	3704.85	n.d.	n.d.	n.d.
			18	12	2	23210.6	n.d.	n.d.	n.d.
			18	12	3	2.26258e+07	n.d.	n.d.	n.d.
			18	12	4	39056.8	n.d.	n.d.	n.d.
			18	12	5	20582.1	n.d.	n.d.	n.d.
Donor	CSF	Vaccinated	19	10	1	3889.33	n.d.	n.d.	n.d.
			19	10	2	31969.3	n.d.	n.d.	n.d.
			19	10	3	11135.9	n.d.	n.d.	n.d.
			19	10	4	5720.8	n.d.	n.d.	n.d.
			19	10	5	2524.37	n.d.	n.d.	n.d.
			19	12	1	51274.2	n.d.	n.d.	n.d.
			19	12	2	n.d.	n.d.	n.d.	n.d.		yes
			19	12	3	6037.57	n.d.	n.d.	n.d.
			19	12	4	n.d.	n.d.	n.d.	n.d.		yes
			19	12	5	1858.2	n.d.	n.d.	n.d.
Donor	Tx	Sham	17	10	1	n.d.	n.d.	n.d.	n.d.		yes
			17	10	2	7528.63	814057	4.71389e+07	8.58176e+06	yes
			17	10	3	2210.29	n.d.	385667	157217	yes
			17	10	4	n.d.	n.d.	n.d.	n.d.		yes
			17	10	5	n.d.	n.d.	845258	402272
			17	12	1	n.d.	n.d.	96042	300947
			17	12	2	b.q.	n.d.	n.d.	n.d.
			17	12	3	b.q.	n.d.	139323	n.d.
			17	12	4	428290	n.d.	5.85182e+06	17671.9	yes
			17	12	5	39362.1	2050.75	1.74064e+08	707020	yes
Donor	Tx	Vaccinated	23	10	1	n.d.	n.d.	n.d.	n.d.		yes
			23	10	2	6652.05	n.d.	n.d.	n.d.
			23	10	3	2628.09	n.d.	n.d.	n.d.
			23	10	4	n.d.	n.d.	n.d.	n.d.		yes
			23	10	5	2673.67	n.d.	n.d.	n.d.
			23	12	1	b.q.	n.d.	n.d.	n.d.
			23	12	2	1632.73	n.d.	n.d.	n.d.
			23	12	3	1454.63	n.d.	n.d.	n.d.
			23	12	4	11528	n.d.	n.d.	n.d.
			23	12	5	n.d.	n.d.	n.d.	n.d.		yes
Recipient	CSF	Sham	4	10	1	n.a.	n.d.	n.a.	n.d.		yes
			4	10	2	n.a.	n.d.	n.a.	n.d.		yes
Recipient	CSF	Vaccinated	9	10	4	n.d.	n.d.	n.d.	n.d.		yes
			9	10	5	n.d.	n.d.	n.d.	n.d.		yes
Recipient	Tx	Sham	2	1	3	n.a.	n.d.	n.a.	n.d.		yes
			2	1	4	n.a.	n.d.	n.a.	n.d.		yes
			2	1	5	n.a.	n.d.	n.a.	n.d.		yes
			2	1	6	n.a.	n.d.	n.a.	n.d.		yes
			2	1	7	n.a.	n.d.	n.a.	n.d.		yes
			2	3	1	n.a.	n.d.	n.a.	n.d.		yes
			2	3	2	n.a.	n.d.	n.a.	n.d.		yes
			2	3	3	n.a.	n.d.	n.a.	n.d.		yes
			2	3	4	n.a.	n.d.	n.a.	n.d.		yes
			2	3	5	n.a.	n.d.	n.a.	n.d.		yes
			2	6	1	n.a.	n.d.	n.a.	n.d.		yes
			2	6	3	n.a.	n.d.	n.a.	n.d.		yes
			2	6	4	n.a.	3416.92	n.a.	426263	yes
			2	6	5	n.a.	n.d.	n.a.	n.d.		yes
			2	6	6	n.a.	n.d.	n.a.	57378.5
			2	10	1	n.a.	n.d.	n.a.	n.d.		yes
			2	10	2	n.a.	n.d.	n.a.	n.d.		yes
			2	10	3	n.a.	n.d.	n.a.	n.d.		yes
			2	10	4	n.a.	190073	n.a.	9.84626e+06	yes
			2	10	5	n.a.	25679.9	n.a.	3.32624e+07	yes
			2	12	1	n.a.	n.d.	n.a.	n.d.		yes
			2	12	2	n.a.	n.d.	n.a.	4079.23
			2	12	3	n.a.	5343.03	n.a.	n.d.
			2	12	4	n.a.	n.d.	n.a.	n.d.		yes
			2	12	5	n.a.	1171.56	n.a.	5.00243e+06	yes
			2	17	1	n.a.	n.d.	n.a.	n.d.		yes
			2	17	2	n.a.	n.d.	n.a.	n.d.		yes
			2	17	3	n.a.	n.d.	n.a.	2267.97
			2	17	4	n.a.	n.d.	n.a.	8649.54
			2	17	5	n.a.	n.d.	n.a.	n.d.		yes
			2	19	1	n.a.	n.d.	n.a.	n.d.		yes
			2	19	2	n.a.	n.d.	n.a.	n.d.		yes
			2	19	3	n.a.	n.d.	n.a.	n.d.		yes
			2	19	4	n.a.	49151.4	n.a.	n.d.
			2	19	5	n.a.	259004	n.a.	3360.18	yes
			2	24	1	n.a.	n.d.	n.a.	n.d.		yes
			2	24	2	n.a.	n.d.	n.a.	n.d.		yes
			2	24	3	n.a.	n.d.	n.a.	n.d.		yes
			2	24	4	n.a.	n.d.	n.a.	n.d.		yes
			2	24	5	n.a.	n.d.	n.a.	18198.5
			2	26	1	n.a.	8185.64	n.a.	n.d.
			2	26	2	n.a.	n.d.	n.a.	n.d.		yes
			2	26	3	n.a.	n.d.	n.a.	n.d.		yes
			2	26	4	n.a.	n.d.	n.a.	n.d.		yes
			2	26	5	n.a.	n.d.	n.a.	n.d.		yes
Recipient	Tx	Vaccinated	5	10	1	n.a.	n.d.	n.a.	n.d.		yes
			5	10	2	n.a.	n.d.	n.a.	n.d.		yes
n.a.= not assayed
n.d.= not detected; Ct value not determined
b.q.= below quantitation; Ct detected, <1000 GE/g

## Sheet: Suppl. Table 2 
Supplemental Table 2. Dead fish processed for F. psychrophilum and IHNV load.
						BCWD		IHNV
						External (gill/fin)	Internal (kid/spln)	External (gill/fin)	Internal (kid/spln)	Co-infect	Neither
Exposure	Line	IHNV Vac	Tank	Day	Fish #	Fp GE/g	Fp GE/g	Copies/g	Copies/g	(+ either Ext or Int)	Fp+ or IHNV+
Constant	CSF	Sham	14	8	1	n.d.	n.d.	n.d.	n.d.		yes
			14	8	2	n.d.	898998	5.82394e+06	1.17139e+08	yes
			14	9	1	n.d.	n.d.	n.d.	n.d.		yes
			14	9	2	n.d.	b.q.	n.d.	n.d.		yes
			14	18	1	n.d.	n.d.	n.d.	n.d.		yes
			14	18	2	1396.85	n.d.	n.d.	n.d.
			14	18	4	n.d.	n.a.	n.d.	n.d.		yes
			14	18	5	n.d.	n.d.	n.d.	n.d.		yes
			14	19	1	n.d.	n.d.	n.d.	n.d.		yes
Constant	CSF	Vaccinated	24	8	1	b.q.	10806.3	n.d.	n.d.
			24	8	2	n.d.	n.d.	n.d.	n.d.		yes
			24	9	1	n.d.	n.d.	n.d.	n.d.		yes
			24	18	1	n.d.	n.d.	n.d.	n.d.		yes
			24	18	2	n.d.	b.q.	n.d.	n.d.
			24	18	3	n.d.	n.d.	n.d.	n.d.		yes
			24	18	4	n.d.	n.d.	n.d.	n.d.		yes
			24	18	5	2525.73	n.d.	n.d.	n.d.
			24	19	3	n.d.	n.d.	n.d.	n.d.		yes
Constant	Tx	Sham	21	8	1	n.d.	n.d.	n.d.	n.d.		yes
			21	8	2	n.d.	62210.6	1.47796e+07	13816080	yes
			21	8	3	n.d.	n.d.	n.d.	n.d.		yes
			21	9	1	n.d.	n.d.	n.d.	n.d.		yes
			21	9	2	n.d.	n.d.	n.d.	n.d.		yes
			21	9	3	n.d.	n.d.	n.d.	n.d.		yes
			21	10	1	524914	n.d.	n.d.	n.d.
			21	10	2	7778.65	n.d.	36269.8	296934	yes
Constant	Tx	Vaccinated	16	8	1	n.d.	n.d.	n.d.	n.d.		yes
			16	8	2	n.d.	n.d.	n.d.	n.d.		yes
			16	8	3	n.d.	n.d.	n.d.	n.d.		yes
			16	9	1	b.q.	n.d.	n.d.	n.d.		yes
			16	9	2	n.d.	n.d.	n.d.	n.d.		yes
			16	9	3	3947.99	n.d.	n.d.	n.d.
			16	10	1	1415.08	n.d.	n.d.	n.d.
			16	10	2	19615.9	n.d.	n.d.	n.d.
			16	16	2	n.d.	n.d.	n.d.	n.d.		yes
Donor	CSF	Sham	18	9	1	2368.23	n.d.	n.d.	n.d.
			18	18	1	n.d.	n.d.	n.d.	n.d.		yes
			18	18	2	190784	10841	n.d.	n.d.
			18	18	3	n.d.	n.d.	n.d.	n.d.		yes
			18	18	4	n.d.	n.d.	n.d.	n.d.		yes
			18	18	5	50744.3	n.d.	n.d.	n.d.
Donor	CSF	Vaccinated	19	9	1	b.q.	n.d.	n.d.	n.d.
			19	18	1	n.d.	n.d.	n.d.	n.d.		yes
			19	18	2	n.d.	n.d.	n.d.	n.d.		yes
			19	18	3	10749.4	n.d.	n.d.	n.d.
			19	18	4	n.d.	n.d.	n.d.	n.d.		yes
			19	18	5	54182.6	n.d.	n.d.	n.d.
Donor	Tx	Sham	17	9	1	186325	n.a.	n.d.	n.a.
			17	9	2	n.d.	n.d.	n.d.	n.d.		yes
			17	10	1	12733.5	n.d.	n.d.	n.d.
Donor	Tx	Vaccinated	23	9	1	341723	n.d.	n.d.	571329	yes
			23	9	2	73631.9	n.d.	n.d.	n.d.
			23	10	1	n.d.	n.d.	n.d.	n.d.		yes
			23	10	2	8348.71	n.d.	n.d.	n.d.
Recipient	CSF	Sham	2	17	1	n.a.	n.d.	n.a.	17094.9
			2	17	2	n.a.	n.d.	n.a.	n.d.		yes
			2	17	5	n.a.	n.d.	n.a.	142776
n.a.= not assayed
n.d.= not detected; Ct value not determined
b.q.= below quantitation; Ct detected, <1000 GE/g
